# Supplementary material for: Role of novel silicon nanoparticles in luminescence detection of a family of antibiotics
Source: Royal Society of Chemistry journal article supplement (doi:10.1039/c5ra01769f), 2015-01-01
Supplement: c5ra01769f1.pdf [file c5ra01769f1.pdf]

*Supporting information for*

**Role of novel silicon nanoparticles in luminescence detection of a family of antibiotics**

Jintai Lin <sup>b</sup>, Qianming Wang <sup>a,b,c\*</sup>

*<sup>a</sup> Key Laboratory of Theoretical Chemistry of Environment, Ministry of Education, School of Chemistry and Environment, South China Normal University, Guangzhou 510006, P. R. China*

*<sup>b</sup> School of Chemistry and Environment, South China Normal University, Guangzhou 510006, P. R. China*

*<sup>c</sup> Guangzhou Key Laboratory of Materials for Energy Conversion and Storage, Guangzhou, 510006, P. R. China*

\* To whom the correspondence should be addressed. E-mail: [qmwang@scnu.edu.cn](mailto:qmwang@scnu.edu.cn)  
Tel: 86-20-39310258; Fax: 86-20-39310187

## Figure Captions

**Figure S1** Emission spectra of SiNPs upon addition of 50 nM - 50 $\mu$ M of OTC in PBS buffer solution (pH 7.4) under excitation at 350 nm. Inset: plot of fluorescence intensity decrease ( $F / F_0$ ) versus the concentration of OTC.

**Figure S2** Emission spectra of SiNPs upon addition of 50 nM - 50 $\mu$ M of CTC in PBS buffer solution (pH 7.4) under excitation at 350 nm. Inset: plot of fluorescence intensity decrease ( $F / F_0$ ) versus the concentration of CTC.

**Figure S3** Fluorescence intensity decrease ( $F / F_0$ ) of SiNPs in the presence of 10  $\mu$ M TC, OTC, CTC, cefalexin, sulfamonomethoxine, penicillin and trimethoprim.

**Figure S4** Fluorescence intensity decrease ( $F / F_0$ ) of SiNPs in the presence of 10  $\mu$ M saccharides and amino acids.

**Figure S5** Fluorescence intensity decrease ( $F / F_0$ ) of SiNPs in the presence of 100  $\mu$ M anions and cations.

**Figure S6** The fluorescence decay curves of SiNPs in the absence and presence of 10  $\mu$ M TC, OTC and CTC.

**Figure S7** UV-vis absorption spectra of SiNPs in PBS solution (pH 7.4) in the absence and presence of 50  $\mu$ M TC.

**Figure S8** UV-vis absorption spectra of TC and emission spectra SiNPs in PBS solution (pH =7.4) under excitation at 350 nm.

**Table S1** Zeta potentials of SiNPs-1 and SiNPs-2 in the absence or presence of tetracyclines (10  $\mu$ M)

**Table S2** Recoveries of OTC in supplemented milk detected by SiNPs as optical sensor.

**Table S3** Recoveries of CTC in supplemented milk detected by SiNPs as optical sensor.

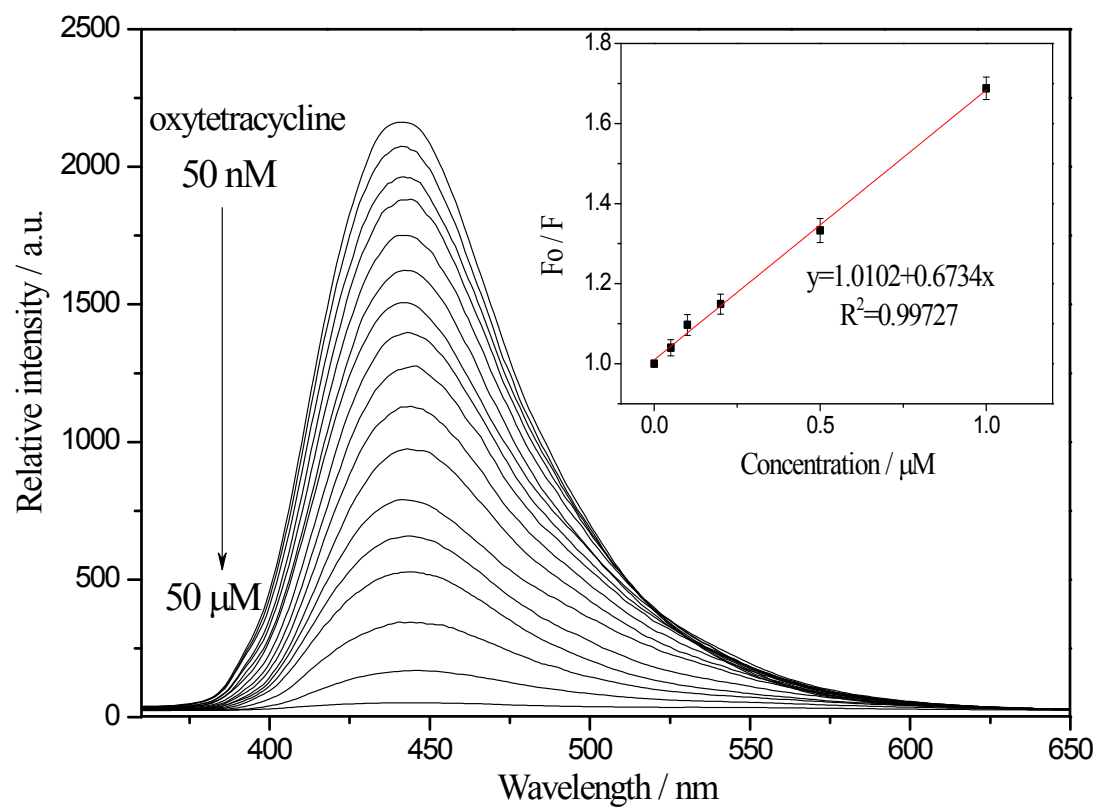

Figure S1

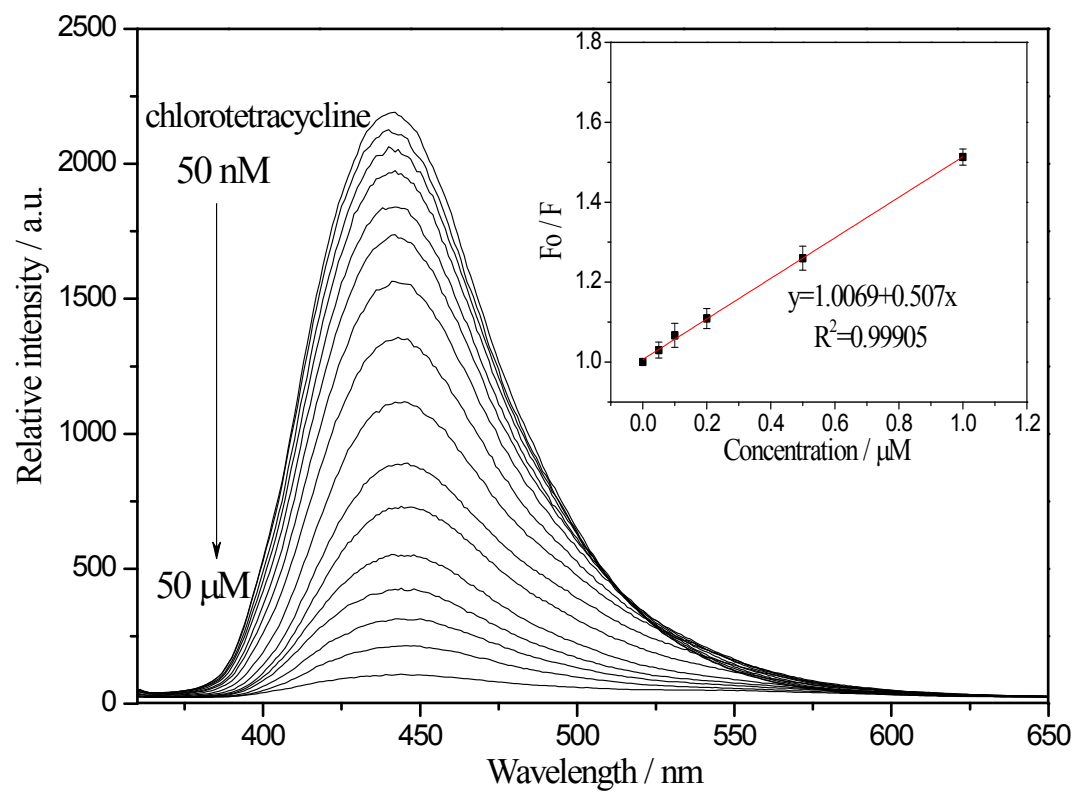

Figure S2

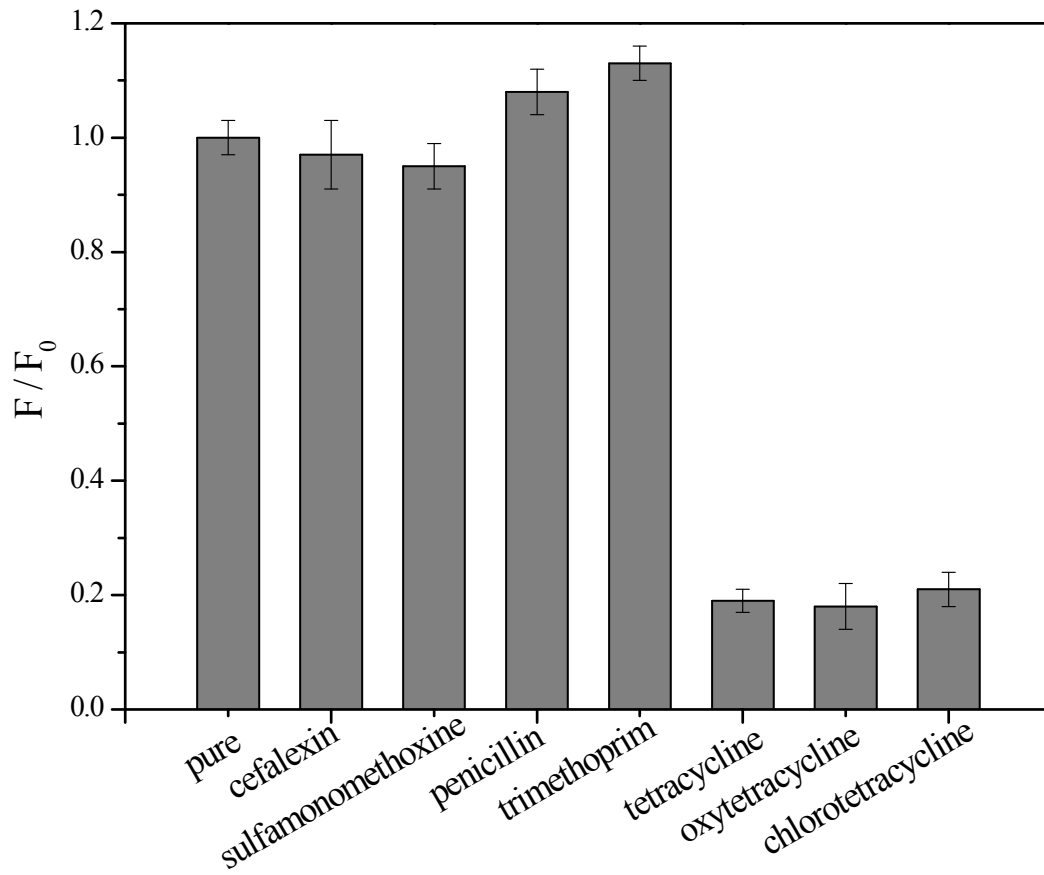

Figure S3

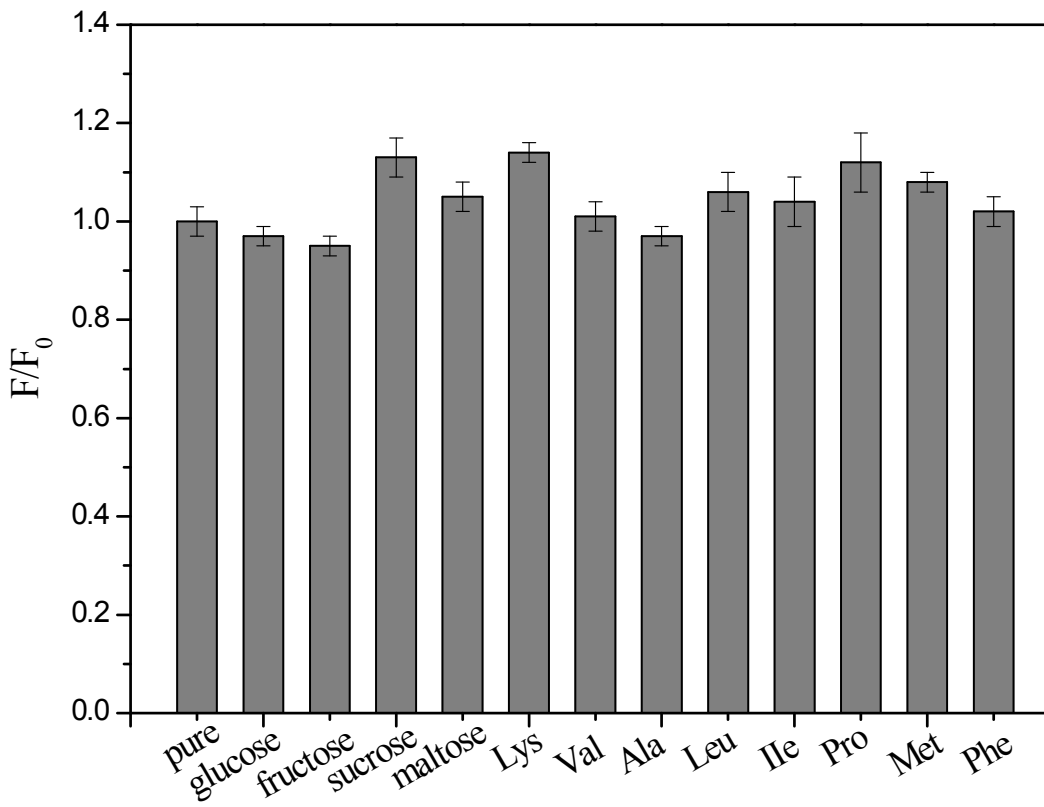

Figure S4

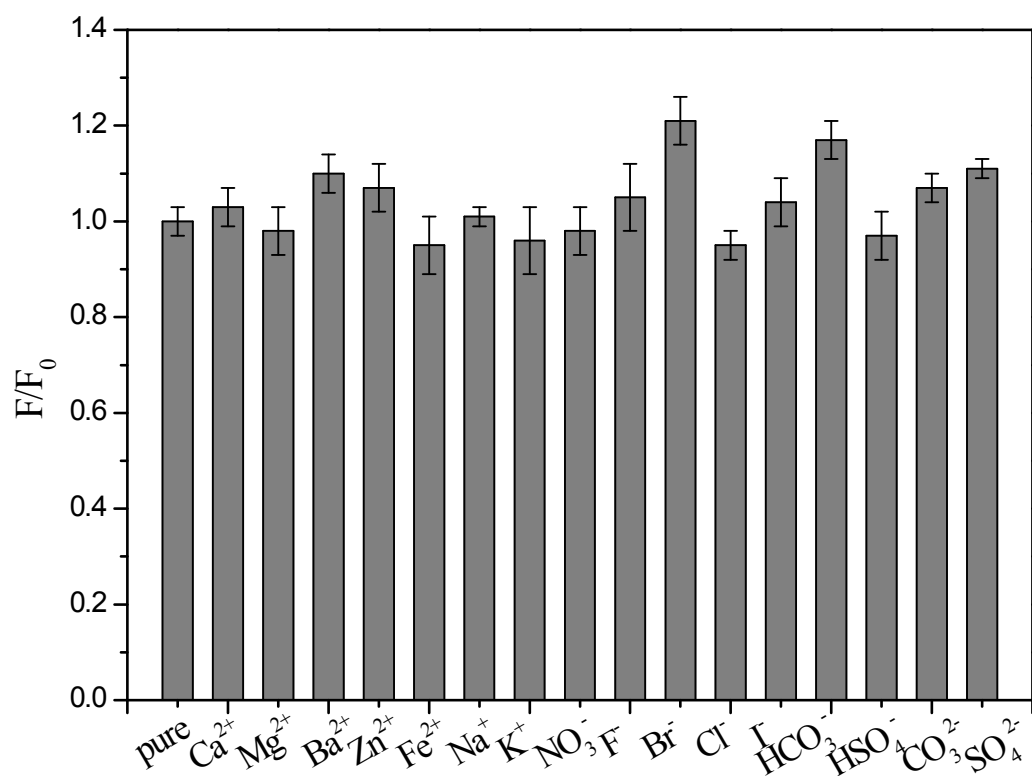

Figure S5

Table S1

|         | Before / mv    | After / mv     |
|---------|----------------|----------------|
| SiNPs-1 | -28.67±2.17    | -19.37±1.56    |
| SiNPs-2 | -32.14.67±1.76 | -21.37.67±1.12 |

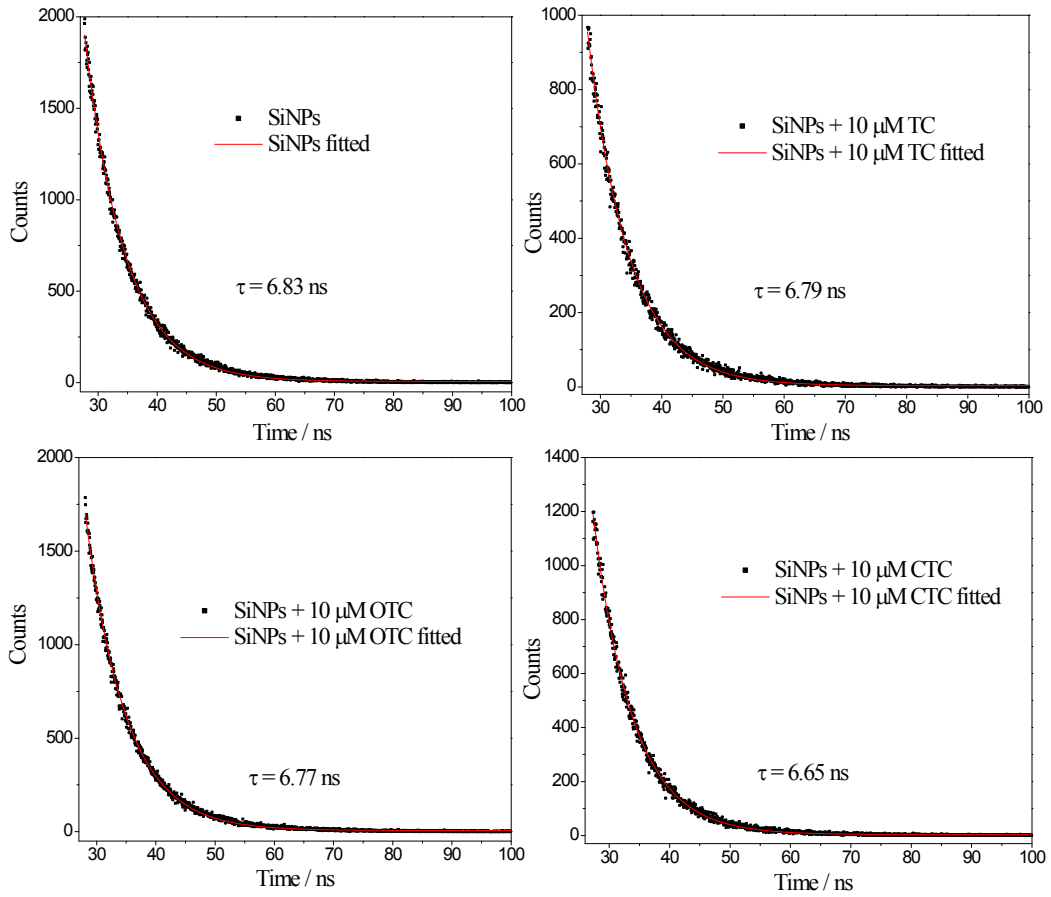

Figure S6

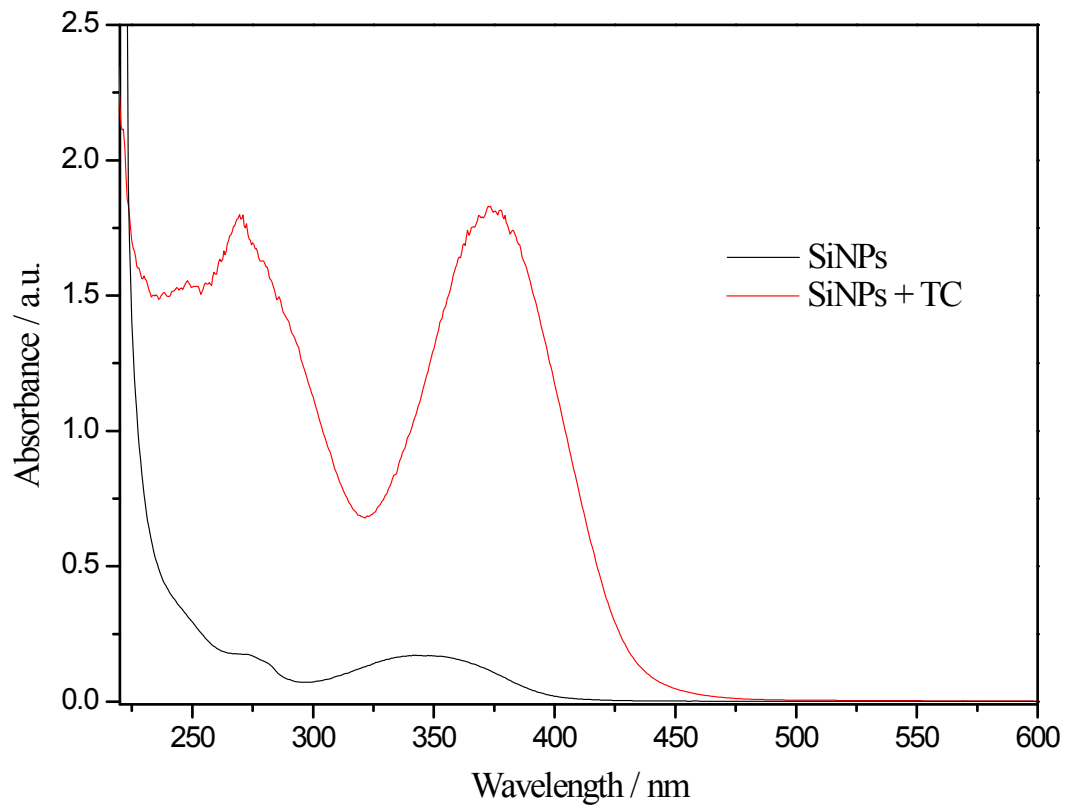

Figure S7

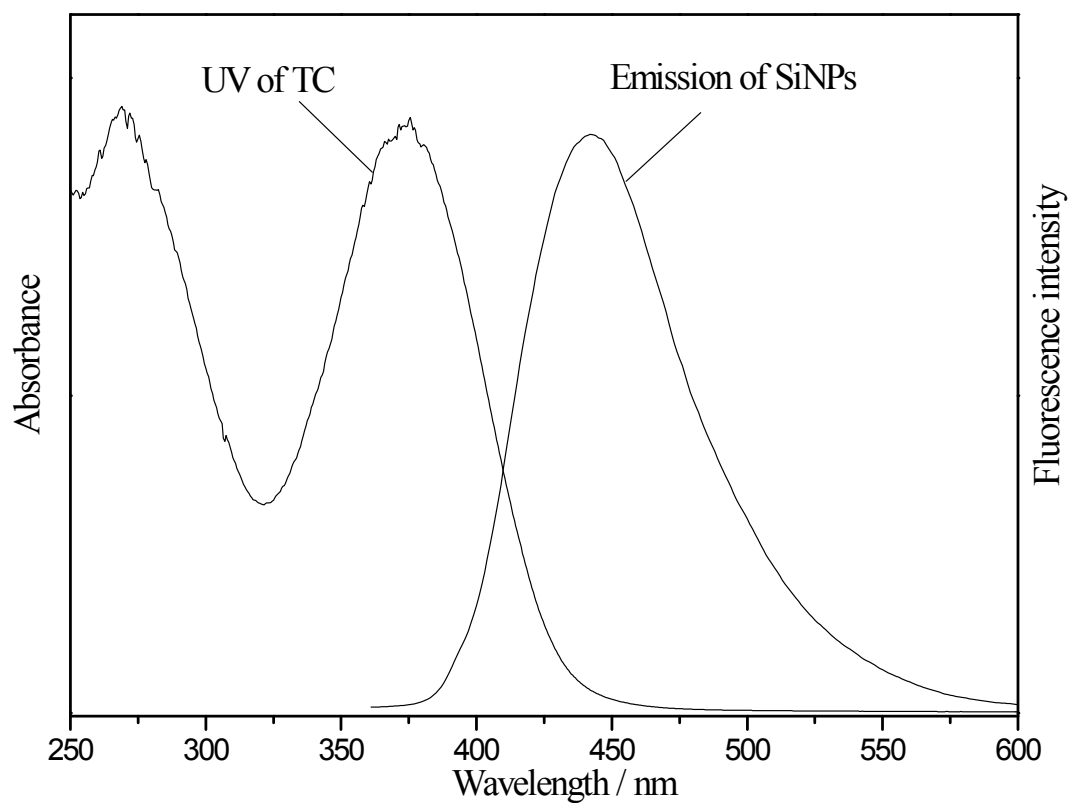

Figure S8

Table S2

| Samples | OTC supplemented ( $\mu\text{M}$ ) | OTC measured ( $\mu\text{M}$ ) | Recovery (%) | RSD(% , n=3) |
|---------|------------------------------------|--------------------------------|--------------|--------------|
| 1       | 0.5                                | 0.52                           | 104.0        | 3.7          |
| 2       | 1                                  | 1.08                           | 108.0        | 3.1          |
| 3       | 3                                  | 2.93                           | 97.6         | 2.8          |
| 4       | 5                                  | 4.89                           | 97.8         | 3.2          |

Table S3

| Samples | CTC supplemented ( $\mu\text{M}$ ) | CTC measured ( $\mu\text{M}$ ) | Recovery (%) | RSD(% , n=3) |
|---------|------------------------------------|--------------------------------|--------------|--------------|
| 1       | 0.5                                | 0.48                           | 96.0         | 3.5          |
| 2       | 1                                  | 0.97                           | 97.0         | 2.8          |
| 3       | 3                                  | 3.12                           | 104.0        | 3.3          |
| 4       | 5                                  | 4.91                           | 98.2         | 3.6          |
